# Supplementary figures and images for: Revealing the Inhibition of Tea Cultivar ‘Ziyan’ Root Growth Caused by High Nitrogen Based on Physiological, Metabolite, and Transcriptome Analyses
Source: MDPI journal article supplement (doi:10.3390/agronomy13040968), 2023-03-24

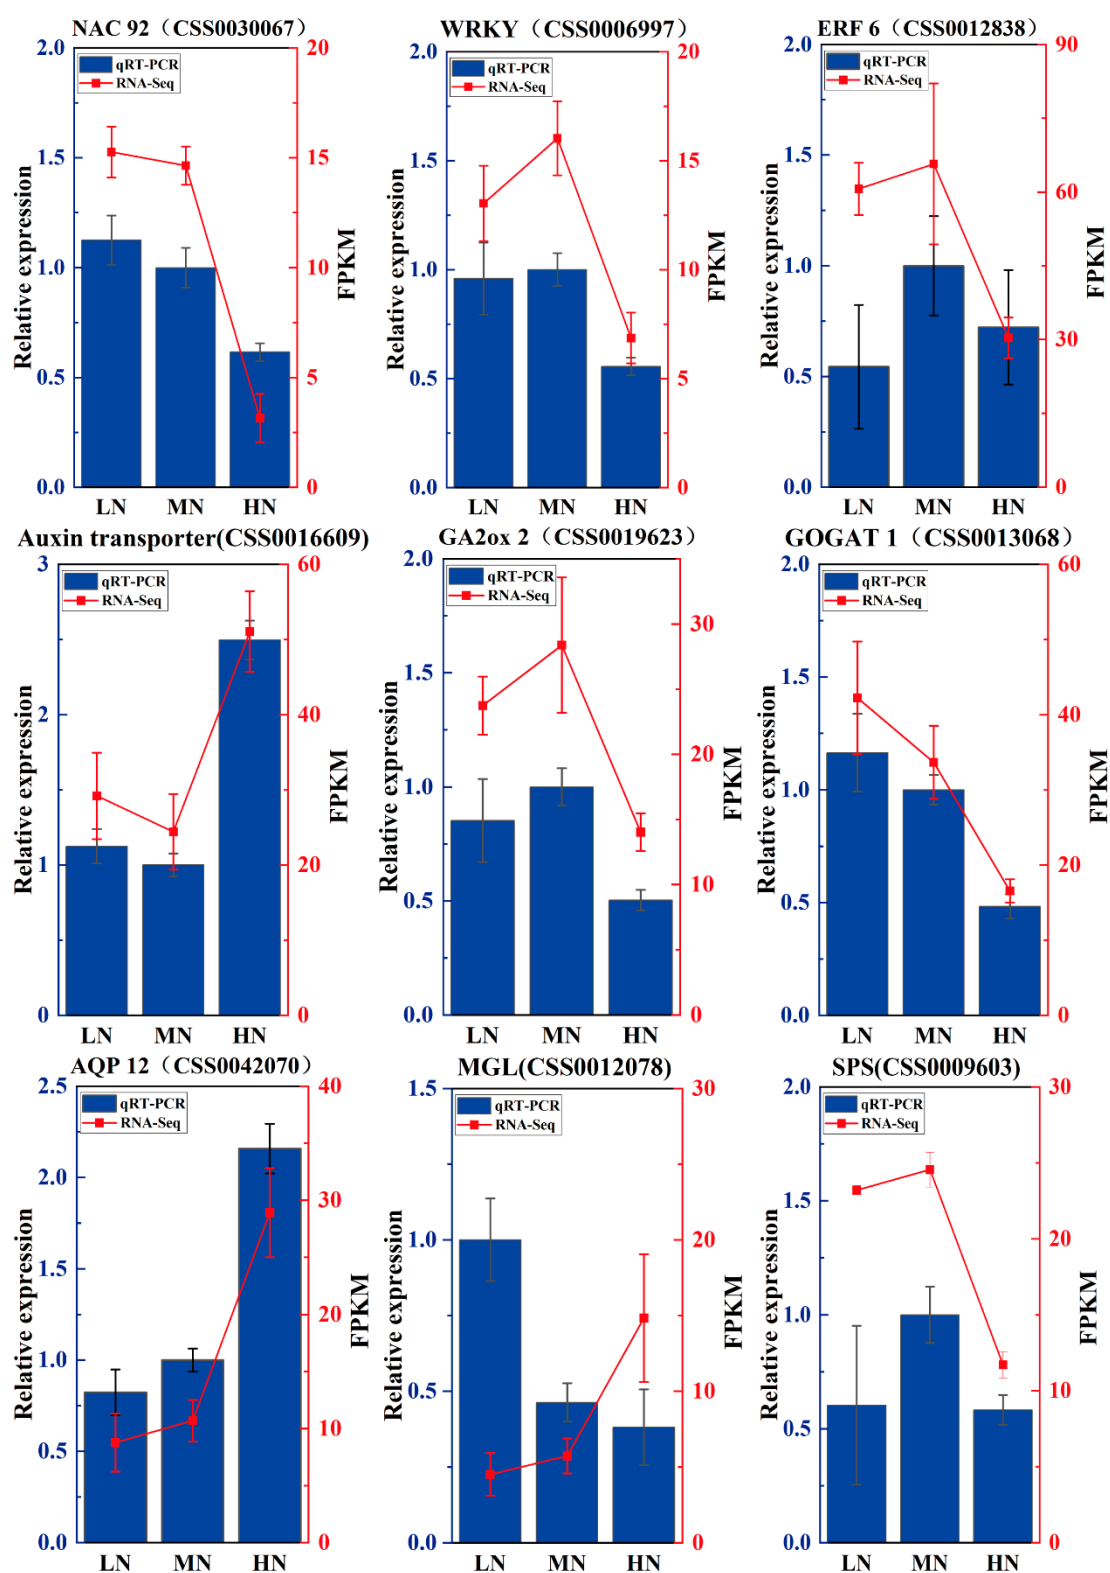

**Figure S1.** RT-qPCR validation of some genes under nitrogen treatment.

Supplement: s1 [file s1]
